# Supplementary material for: Strengthening and Institutionalizing the Leadership and Management Role of Frontline Nurses to Advance Universal Health Coverage in Zambia
Source: PubMed Central journal article supplement (PMC6370361; doi:10.9745/ghsp-d-18-00067), 2018-12-27
Supplement: 18-00067-Nelson-Supplement2.pdf [file 18-00067-Nelson-Supplement2.pdf]

## CLMP Participating Facilities, with Community Health Improvement Project (CHIP) Goals and Results

| Province/<br>District | Facility                          | Nurse In-Charge         | Staff*                                                              | CBVs | Population<br>Served | CHIP Goal                                                                                                             | CHIP Results                                                                                              |
|-----------------------|-----------------------------------|-------------------------|---------------------------------------------------------------------|------|----------------------|-----------------------------------------------------------------------------------------------------------------------|-----------------------------------------------------------------------------------------------------------|
| Central/<br>Chisamba  | Chisamba RHC                      | Wilson<br>Nakaanga      | MW-1, N-<br>6, EHT-1,<br>LT-1, PT-1,<br>CDE-2                       | 60   | 12,693               | Increase<br>postnatal<br>coverage at 6<br>days                                                                        | Achieved: From 15% in<br>March 2016 to 50% by<br>March 2017.                                              |
| Central/<br>Chisamba  | Chikonkomewe<br>Mulungushi<br>RHC | Nathan<br>Hamooya       | MW - 2,<br>N- 1, EHT -<br>1, CHA - 3,<br>CDEs - 1                   | 60   | 12,656               | increase the % of<br>under ones fully<br>immunized                                                                    | Achieved: Began at 6% in<br>June of 2016 and reached<br>80% by June of 2017                               |
| Central/<br>Chisamba  | Mwapula RHP                       | Sydney Chazula          | CO - 1,<br>CHA - 2,<br>CDE - 1                                      | 47   | 6,521                | Increase facility<br>deliveries                                                                                       | Achieved: Began at 29%<br>in July 2016 and reached<br>47% in May of 2017.                                 |
| Central/<br>Chisamba  | Momboshi RHP                      | Milani Mayoba           | MW -1, N-<br>1, EHT - 1                                             | 65   | 14,922               | Increase facility<br>deliveries                                                                                       | Achieved: Began at 40%<br>in 2nd quarter 2016, and<br>reached 70% by the end of<br>the first quarter 2017 |
| Lusaka/<br>Chongwe    | Chongwe RHC                       | Mary Munthali<br>Kahula | MW- 2, N-<br>8, EHT - 1,<br>LT - 3, PT -<br>4, CDEs -<br>4, COs - 4 | 35   | 17,328               | Increase the<br>percentage of<br>HIV/AIDS<br>exposed infants<br>that are tested<br>are tested for<br>HIV at 18 months | Achieved: Began at 35%<br>in October 2016 and<br>achieved 55% at end of<br>second quarter 2017<br>(June)  |
| Lusaka/<br>Chongwe    | Kapete RHP                        | Joseph Chakwira         | CHA-1                                                               | 9    | 1,425                | Provide Patient<br>STI counseling<br>and testing                                                                      | Achieved: Began at 0% in<br>October 2016 and ended<br>at 75% in May 2017                                  |
| Lusaka/<br>Chongwe    | Shiyala RHP                       | Margaret<br>Mataka      | CHA-1                                                               | 18   | 2,457                | Increase early<br>enrollment of<br>pregnant women<br>in ANC                                                           | Achieved: Began at 30%<br>in June 2016 and reached<br>80% in June of 2017                                 |

| Province/<br>District | Facility          | Nurse In-Charge                  | Staff*                        | CBVs | Population<br>Served | CHIP Goal                                                                                                                  | CHIP Results                                                                                  |
|-----------------------|-------------------|----------------------------------|-------------------------------|------|----------------------|----------------------------------------------------------------------------------------------------------------------------|-----------------------------------------------------------------------------------------------|
| Lusaka/<br>Chongwe    | Mpango RHC        | Girly Hamoonga                   | N-2, CDE-2                    | 20   | 9,005                | ANC services as close to family as possible and reach the desired state of early enrollment of all pregnant women in ANC   | Achieved: Began at 35% early ANC enrollment in October 2016 and achieved 80% by June 2017     |
| Lusaka/<br>Kafue      | Kafue Mission RHC | Grace Mwamba                     | MW- 6, N - 1, EHT - 1, LT - 1 | 68   | 10,484               | Increase the percentage of women attaining FANC (focused antenatal care)                                                   | Achieved: Began at 57% in October 2016 and reached 70% by June 2017                           |
| Lusaka/<br>Kafue      | Chikoka RHP       | Kufekwa<br>Kufekisa<br>Mulyokela | N-1, CDE-2, CHA-2             | 33   | 3,394                | Reduce the number of teenage pregnancies from 13% at the end of the quarter of 2016 to 8 % by the end of quarter 2 of 2017 | Almost Achieved: Began at 13% in June 2016 and ended at 8% by end of May 2017                 |
| Lusaka/<br>Kafue      | Kabweza RHP       | Albert Chiba                     | N-1, CDE-2, CHA-2             | 45   | 3,120                | Reduce the number of diarrhoeal cases per month                                                                            | Achieved: Began at a monthly average of 50 cases in October 2016 to 16 cases in April of 2017 |
| Lusaka/<br>Kafue      | Mugurameno RHP    | Rosemary Chimwanga               | MW-1, CDE-2, CHA-2            | 36   | 3,080                | To increase 1st ANC coverage below 14 weeks                                                                                | Achieved: Began at 35% in October 2016 and reached 62% in May 2017                            |
| Central/<br>Chibombo  | Shimukuni RHC     | Gertrude Habeenzu Banda          | N- 1, MW-1, EHT - 1, CDE - 1  | 30   | 8,138                | Increase the testing of HIV exposed infants                                                                                | Achieved: Began at 60% in March of 2016 and                                                   |

| Province/<br>District | Facility        | Nurse In-Charge | Staff*              | CBVs | Population<br>Served | CHIP Goal                                      | CHIP Results                                                         |
|-----------------------|-----------------|-----------------|---------------------|------|----------------------|------------------------------------------------|----------------------------------------------------------------------|
|                       |                 |                 |                     |      |                      | (HEI) at 18 months                             | reached 83% in April of 2017.                                        |
| Central/<br>Chibombo  | Kabangalala RHC | Mercy Akende    | N-1, CDE-1          | 4    | 6,023                | Increase facility deliveries                   | Achieved: Began at 40% in September 2016 and reached 56% by May 2017 |
| Central/<br>Chibombo  | Mwanjuni RHP    | Mervice Mbiliti | CDE-1, EHT-1, CHA-2 | 12   | 8,512                | Reduce STI incidence rate                      | Achieved: Began at 6% in October 2016 and reached 5% in May 2017     |
| Central/<br>Chibombo  | Chamakubi RHP   | Markson Subeti  | CDE-1, CHA-2        | n/a  | 6,314                | Increasing Post Natal Care services at 6 weeks | Achieved: Been at 55% in March 2016 and reached 84% in March 2017    |
| Lusaka/<br>Rufunsa    | Rufunsa RHC     | Florence Banda  | CDE-2, EHT-1, CHA-1 | 6    | 5,463                | To increase institutional deliveries           | Achieved: Began at 23% in October 2016 and reached 42% in May 2017   |
| Lusaka/<br>Rufunsa    | Nyamanongo RHP  | Agness Mweemba  | CHA-2               | 6    | 3,215                | Increase retention on PNC                      | Achieved: Began at 30% in June 2016 and reached 50% in June 2017     |

\*Midwife (MW), Nurse (N), Clinical Officer (CO), Environmental Health Technician (EHT), Lab Technician (LT), Pharmacy Technician (PT), Classified Daily Employee (CDE), Community-Based Volunteers (CBVs)
